# Supplementary material for: A Fuzzy Comprehensive Assessment and Hierarchical Management System for Urban Lake Health: A Case Study on the Lakes in Wuhan City, Hubei Province, China
Source: PubMed Central journal article supplement (PMC6313550; doi:10.3390/ijerph15122617), 2018-11-22
Supplement: ijerph-15-02617-s001.pdf [file ijerph-15-02617-s001.pdf]

## Supporting information

**Table S1.** Eutrophication evaluation results of 21 studied lakes

| Lake | TLI   | Grade                 | Surpassing factors         |
|------|-------|-----------------------|----------------------------|
| L1   | 64.17 | Medium eutrophication | TP、TN、SD、COD <sub>Mn</sub> |
| L2   | 49.14 | Medium trophic        | TP、TN、SD、COD <sub>Mn</sub> |
| L3   | 54.15 | Light eutrophication  | TP、TN、SD、COD <sub>Mn</sub> |
| L4   | 50.68 | Light eutrophication  | TP、TN、SD、COD <sub>Mn</sub> |
| L5   | 49.44 | Medium trophic        | /                          |
| L6   | 65.16 | Medium eutrophication | TP、TN、SD                   |
| L7   | 55.57 | Light eutrophication  | TP、TN、SD、COD <sub>Mn</sub> |
| L8   | 55.06 | Light eutrophication  | TP、TN、SD、COD <sub>Mn</sub> |
| L9   | 52.36 | Light eutrophication  | TP、TN、SD、COD <sub>Mn</sub> |
| L10  | 66.58 | Medium eutrophication | TP、TN、SD、COD <sub>Mn</sub> |
| L11  | 58.66 | Light eutrophication  | TP、TN、SD                   |
| L12  | 59.48 | Light eutrophication  | TP、TN、SD、COD <sub>Mn</sub> |
| L13  | 66.92 | Medium eutrophication | TP、TN、SD                   |
| L14  | 65.15 | Medium eutrophication | TP、TN、SD                   |
| L15  | 72.96 | Severe eutrophication | TP、TN、SD                   |
| L16  | 64.90 | Medium eutrophication | TP、TN、SD                   |
| L17  | 66.42 | Medium eutrophication | /                          |
| L18  | 60.10 | Medium eutrophication | TP、SD                      |
| L19  | 51.14 | Light eutrophication  | TN、SD、COD <sub>Mn</sub>    |
| L20  | 61.71 | Medium eutrophication | TP、TN、SD、COD <sub>Mn</sub> |
| L21  | 63.02 | Medium eutrophication | TP、TN、SD、COD <sub>Mn</sub> |

**Table S2.** Health risk indicators for carcinogenic health for 21 studied lakes.

| Lake | CR <sub>i</sub> |          |          | CR       | Grade |
|------|-----------------|----------|----------|----------|-------|
|      | Cr              | As       | Cd       |          |       |
| L1   |                 | 6.73E-06 | 1.63E-07 | 6.89E-06 | II    |
| L2   |                 | 6.35E-06 | 2.76E-07 | 6.63E-06 | II    |
| L3   |                 | 1.23E-05 | 5.92E-08 | 1.24E-05 | III   |
| L4   |                 | 7.07E-06 | 1.73E-07 | 7.24E-06 | II    |
| L5   |                 | 2.48E-06 | 6.91E-08 | 2.55E-06 | II    |
| L6   |                 | 1.16E-05 | 1.09E-07 | 1.17E-05 | III   |
| L7   | <0.1            | 4.73E-06 | 8.39E-08 | 4.82E-06 | II    |
| L8   |                 | 7.93E-06 | 7.40E-08 | 8.00E-06 | II    |
| L9   |                 | 4.40E-06 | <0.1     | 4.40E-06 | II    |
| L10  |                 | 1.11E-05 | 4.93E-08 | 1.12E-05 | III   |
| L11  |                 | 6.13E-06 | 4.44E-08 | 6.18E-06 | II    |
| L12  |                 | 7.77E-06 | 1.97E-08 | 7.79E-06 | II    |
| L13  |                 | 1.17E-05 | 9.87E-08 | 1.18E-05 | III   |
| L14  |                 | 7.06E-06 | 8.88E-08 | 7.14E-06 | II    |

|     |          |          |          |     |
|-----|----------|----------|----------|-----|
| L15 | 9.62E-06 | 1.04E-07 | 9.72E-06 | II  |
| L16 | 1.02E-05 | 1.28E-07 | 1.04E-05 | III |
| L17 | 5.90E-06 | 2.47E-08 | 5.93E-06 | II  |
| L18 | 4.19E-06 | 1.04E-07 | 4.30E-06 | II  |
| L19 | 4.14E-06 | 4.44E-08 | 4.18E-06 | II  |
| L20 | 2.44E-05 | 7.94E-07 | 2.52E-05 | III |
| L21 | 8.28E-06 | 2.47E-08 | 8.30E-06 | II  |

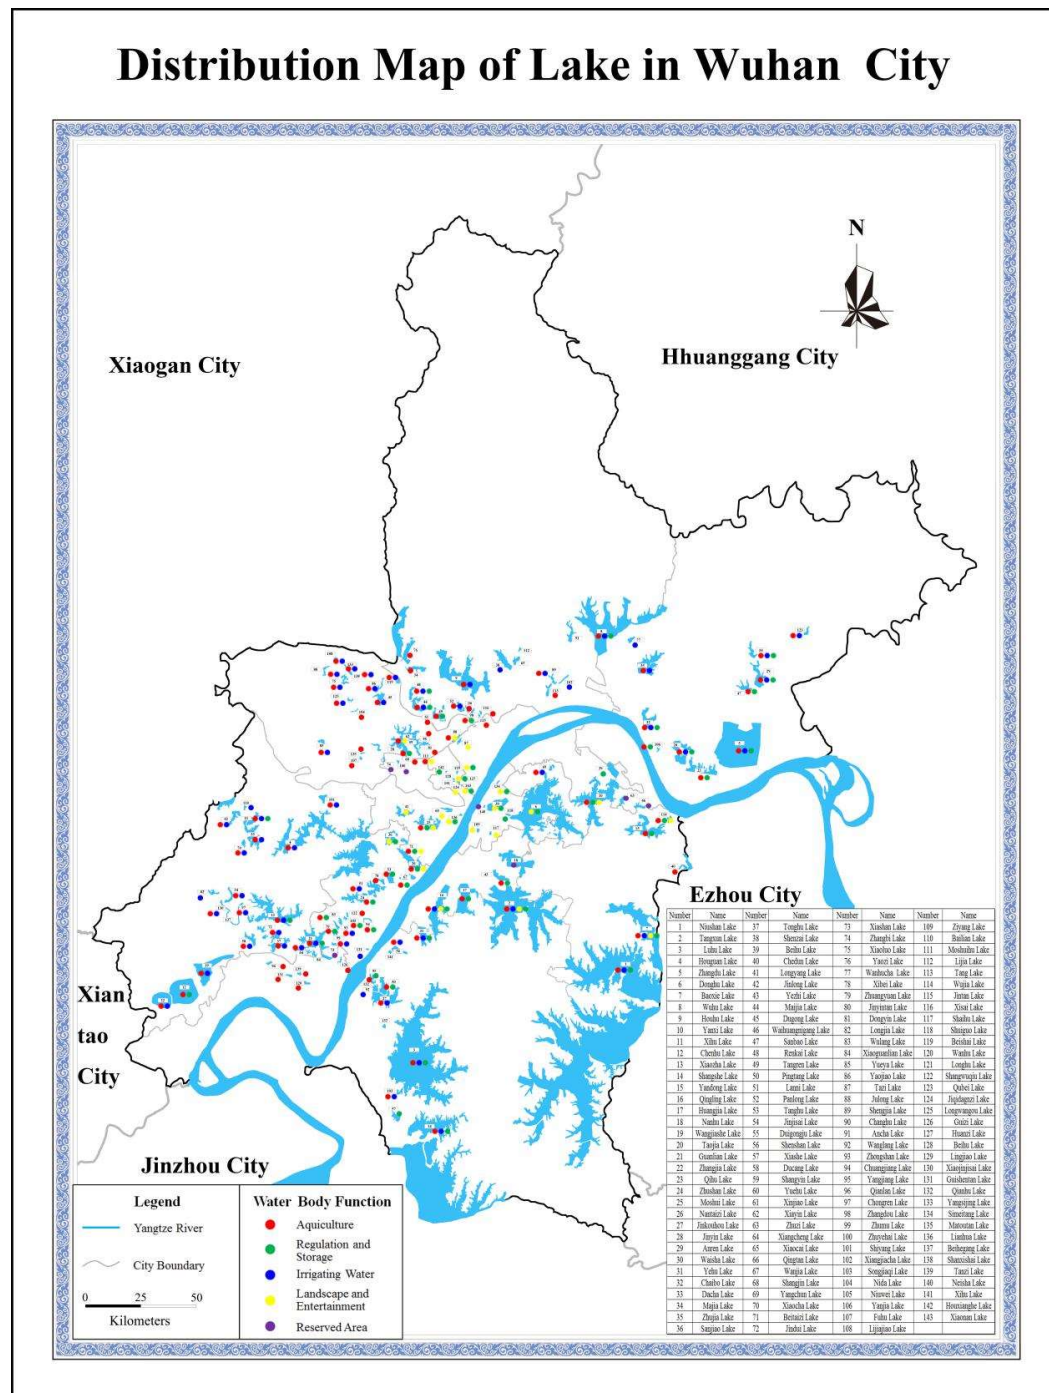

Fig. S1. Distribution map of lake in Wuhan city

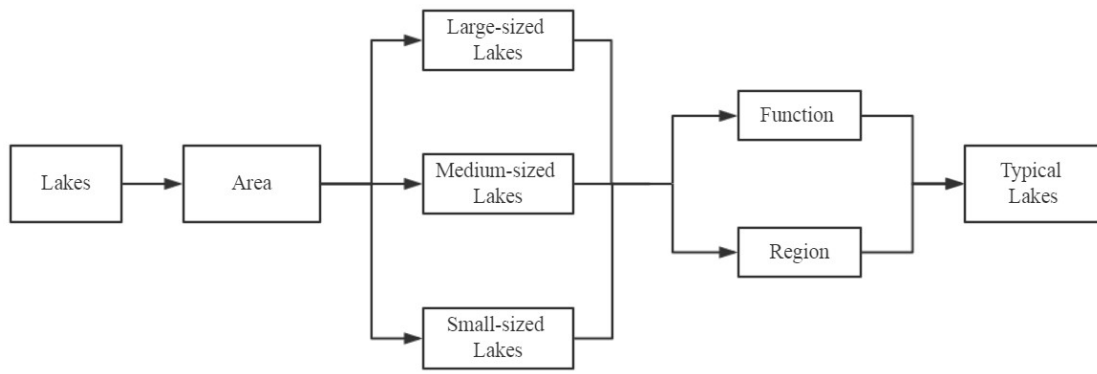

**Fig. S2.** The workflow of typical lake selection method
